# Supplementary material
Source: Springer Nature journal article supplement (https://www.springermedizin.de/resource/supplementary/12958_2009_499_MOESM4_ESM.pdf/9568158)

**A**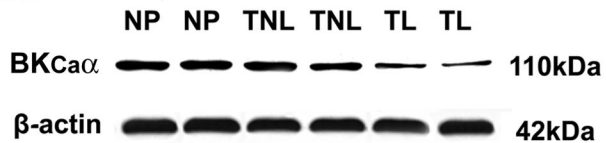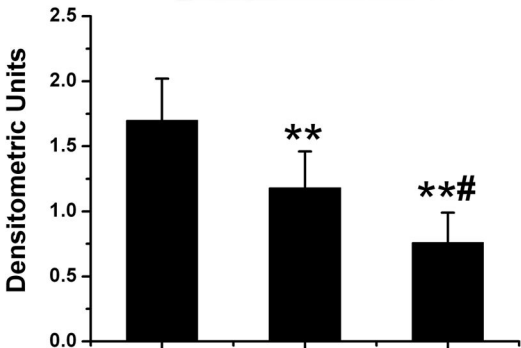

Figure 4

NP

TNL

TL

**B**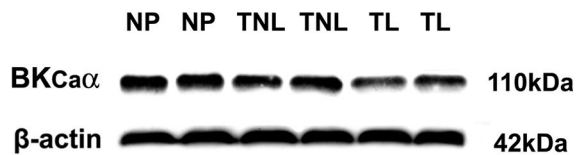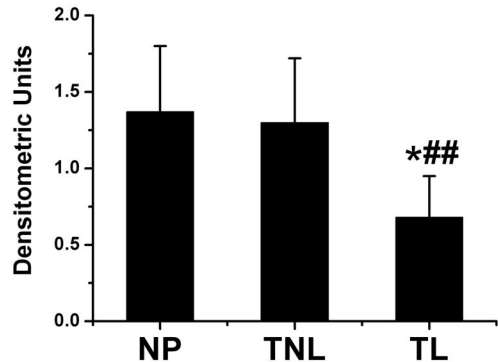

NP

TNL

TL

Supplement: MOESM4 [file 9568158]
